# Supplementary material for: Dextran Conjugation Improves the Structural and Functional Properties of Heat-Treated Protein Isolate from Cinnamomum camphora Seed Kernel
Source: MDPI journal article supplement (doi:10.3390/foods11193066), 2022-10-02
Supplement: s1 [file s1]

## Supplementary material

Figure S1

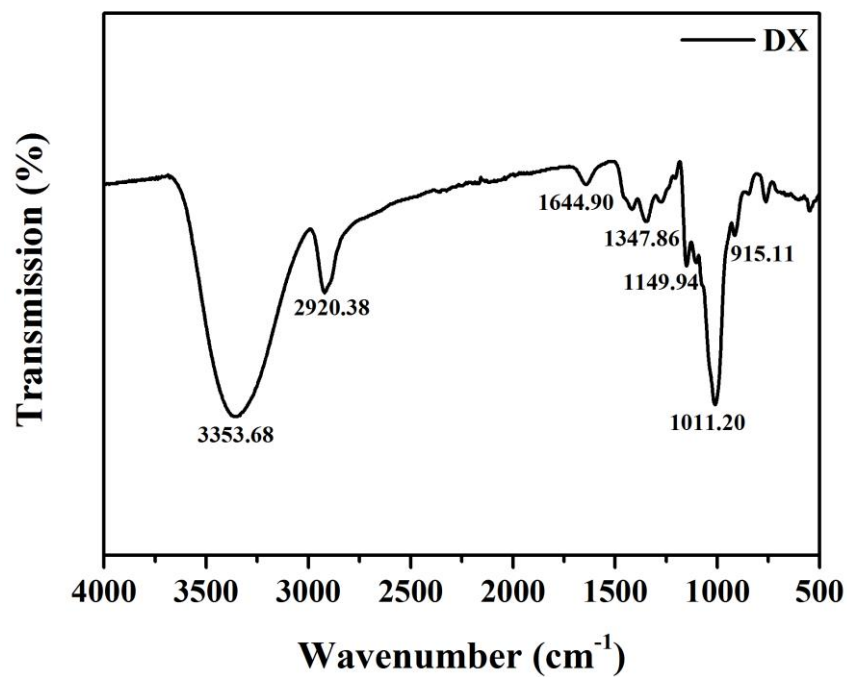

**Figure S1.** The Fourier transform infrared spectroscopy of DX.

**Figure S2**

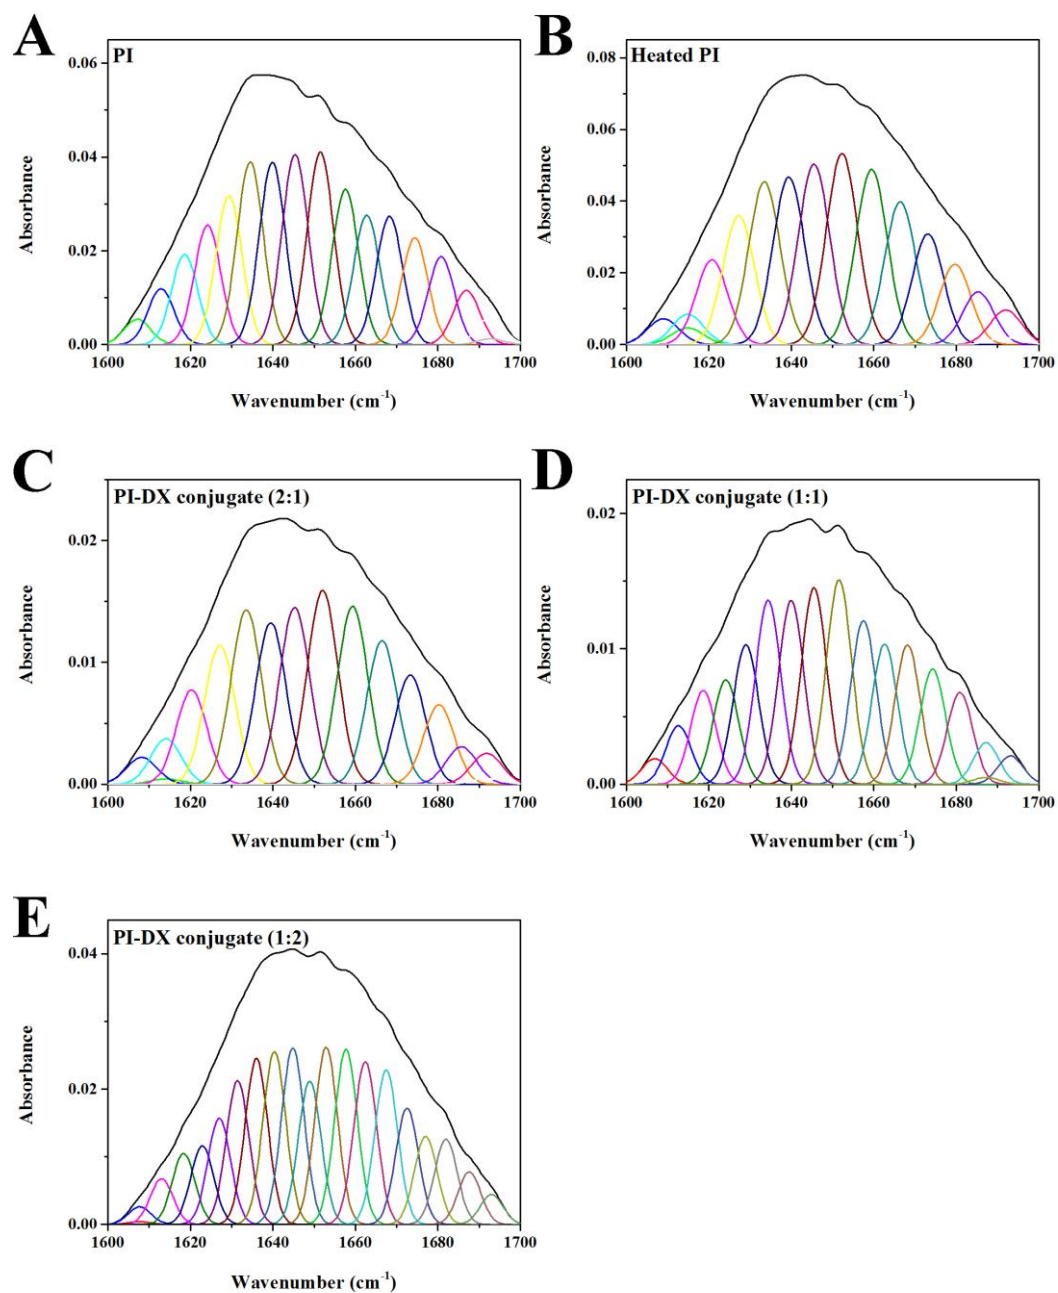

**Figure S2.** The Fourier spectrum (upper) and Gaussian fitting curves (bottom) in the amide I region of PI and PI-DX conjugates.
